# Supplementary material for: Ab Initio Molecular Dynamics Simulations and Vibrational Frequency Calculations of Species in Liquid-Liquid Phase Separated MgSO4 Solution at 543 K
Source: Hindawi journal article supplement (doi:10.1155/2024/8852421), 2024-02-21
Supplement: f1 [file 8852421.f1.pdf]

Supporting Information: *Ab initio* molecular dynamics simulations and  
vibrational frequency calculations of species in liquid-liquid phase separated  
MgSO<sub>4</sub> solution at 543 K

Mengzi Zhou<sup>2</sup>, Xiancai Lu<sup>1,2</sup>, Xiandong Liu<sup>2</sup>, Yingchun Zhang<sup>2</sup>, Xiaoyu Zhang<sup>2</sup>, Kai Wang<sup>2</sup>

<sup>1</sup> Key Lab of Surficial Geochemistry of Ministry of Education, School of Earth Sciences and Engineering, Nanjing University, Nanjing Jiangsu, 210023, P. R. China;

<sup>2</sup> State Key Laboratory for Mineral Deposits Research, School of Earth Sciences and Engineering, Nanjing University, Nanjing Jiangsu, 210023, P. R. China;

**Corresponding Author: Prof. Xiancai Lu, Email: [xcljun@nju.edu.cn](mailto:xcljun@nju.edu.cn).**

## 1. Formulas for vibrational frequency calculation

The vibration of molecules are regarded as harmonic classical oscillators similar to quantum oscillators in static quantum chemical calculations. By performing Fourier transforms of the molecular motion changing with time, the frequency of this motion could be derived.<sup>1, 2</sup>

### 1.1 Autocorrelation function of velocity for Power spectra

The intensity  $P(\omega)$  of Power spectra is defined by the Fourier transform of,

$$P(\omega) = m \int \langle \dot{r}(\tau) \dot{r}(t + \tau) \rangle_{\tau} e^{-i\omega t} dt,$$

where  $\langle \dot{r}(\tau) \dot{r}(t + \tau) \rangle_{\tau}$  denotes the autocorrelation of velocities.

### 1.2 Autocorrelation function of Dipole for Infrared spectra

In order to get dipole moment  $\mu$ , the localization of electron is interpreted by Wannier centers and  $\mu$  is calculated as:

$$\mu = -2e \sum_i r_i + e \sum_j Z_j R_j,$$

where  $R_j$  is the position of nuclear and  $Z_j$  is their charges.  $r_i$  is the location of Wannier Centers.

The intensity of Infrared spectra is,

$$A(\omega) = \int \langle \dot{\mu}(\tau) \dot{\mu}(t + \tau) \rangle_{\tau} e^{-i\omega t} dt.$$

### 1.3 Autocorrelation function of polarizability for Infrared spectra

The deduced dipole moment  $\mu_{ind}$  under the influence of external electric field  $E$  is,

$$\mu_{ind} = \alpha E,$$

where  $\alpha$  is the polarizability and it can be written in matrix form:

$$\begin{bmatrix} \mu_x \\ \mu_y \\ \mu_z \end{bmatrix} = \begin{bmatrix} \alpha_{xx} & \alpha_{xy} & \alpha_{xz} \\ \alpha_{yx} & \alpha_{yy} & \alpha_{yz} \\ \alpha_{zx} & \alpha_{zy} & \alpha_{zz} \end{bmatrix} \begin{bmatrix} E_x \\ E_y \\ E_z \end{bmatrix}.$$

Only the isotropic polarizability (elements along the diagonal) is considered in our work. So the intensity of Raman spectra is,

$$I_{isotropic}(\omega) = \frac{(\omega_{in} - \omega)^4}{\omega} \frac{1}{1 - \exp\left(\frac{-\hbar\omega}{k_B T}\right)} \int \langle \dot{\alpha}_{xx}(\tau) \dot{\alpha}_{xx}(t + \tau) \rangle_{\tau} e^{-i\omega t} dt,$$

where  $\omega_{in}$  is the wavenumber of laser light,  $k_B$  is the Boltzman constant and  $\hbar$  is the reduced Planck constant.

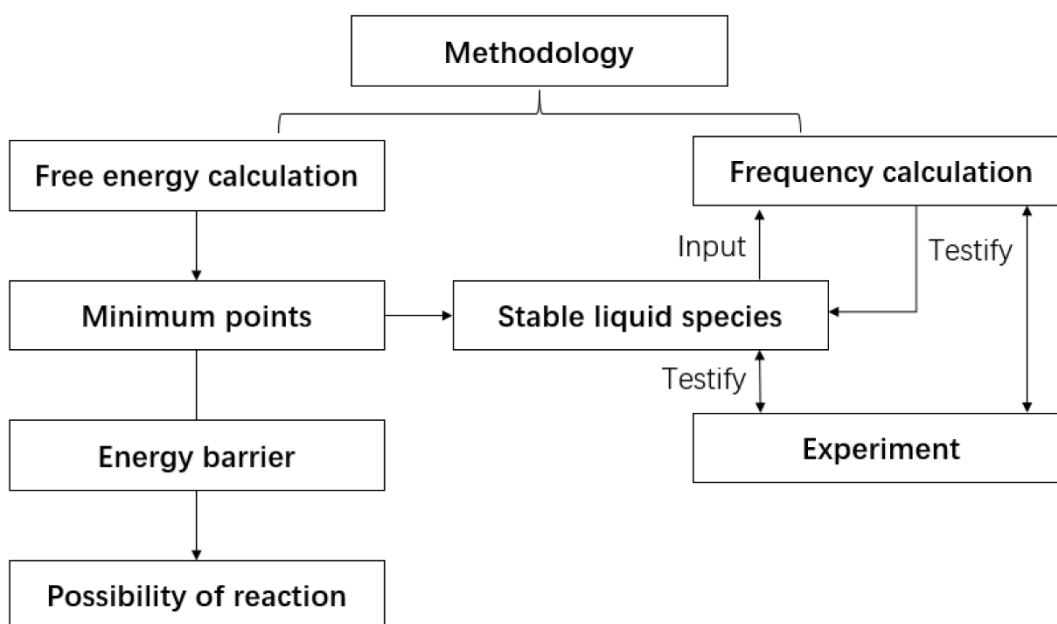

Figure S1. A flowchart of relationship between free energy calculation, frequency calculation and experiment.

## 2. The distribution diagram of HB

The diagrams of  $d_{O...H}$  and  $\theta$  distribution shows below, (Figure S2) which presents the comfort of our HB standard ( $1.2 \leq d_{O...H} \leq 2.3 \text{ \AA}$  and  $\theta \geq 130^\circ$ ).

From Figure S1, average number of hydrogen bonds of water-water and sulfate-water can be counted. Under the precondition that  $d_{O...H}$  and  $\theta$  can walk through the phase space ergodically, Helmholtz free energy of HB is derived from the following formula,

$$e^{\frac{\Delta E}{RT}} = P$$

where  $P$  is the possibility at a certain region of phase diagram. By drawing the isopotential energy surface on the diagram, the free energy change of breaking one HB between sulfate-water (s-w) or water-water (w-w) is  $\sim 5 \text{ kJ/mol}$ .

Hydrogen bond distribution of sulfate-water at 330K

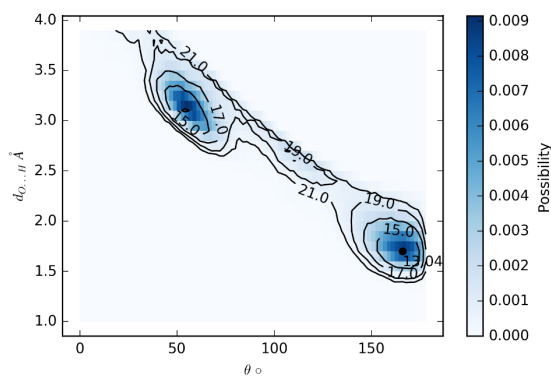

Hydrogen bond distribution of water-water at 330K

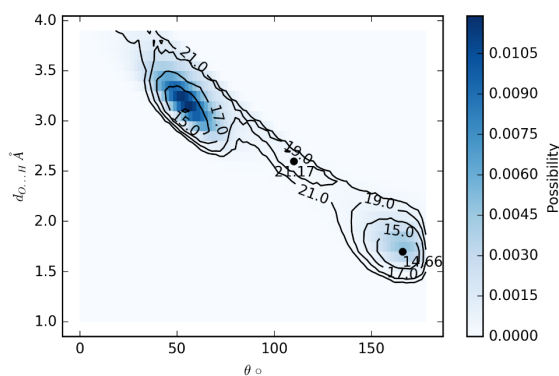

Figure S2. The HB distribution of sulfate-water and water-water at 330K under PBE0 (the unit of isopotential energy surface is kJ/mol)

### 3. The fitting parameters of HB lifetime

Three parameters ( $A_1$ ,  $k_1$ ,  $k_2$ ) need to be fitted for the following formula<sup>3, 4</sup>,

$$C(t) = A_1 e^{-k_1 t} + (1 - A_1) e^{-k_2 t}.$$

It was done by Python Library scipy Function curve\_fit. The detailed parameters for lifetime calculation is listed in Table S1. The lifetime and Number of HB for calculated ensembles are listed in Table S2.

Table S1. The fitting parameters of HB lifetime (s-w represents sulfate anion to water, w-w represents water to water)

| Parameters           | $A_1$ |      | $k_1$ |      | $k_2$ |      |
|----------------------|-------|------|-------|------|-------|------|
|                      | s-w   | w-w  | s-w   | w-w  | s-w   | w-w  |
| <b>330K/PBE0</b>     |       |      |       |      |       |      |
| Free SO <sub>4</sub> | 0.11  | 0.26 | 12.58 | 5.90 | 1.23  | 1.05 |
| Mono-CIP             | 0.61  | 0.39 | 2.32  | 3.82 | 0.58  | 0.78 |
| Bi-CIP               | 0.51  | 0.39 | 3.82  | 4.30 | 0.58  | 0.84 |
| S-M-S                | 1.23  | 1.17 | 1.66  | 1.68 | 1.65  | 1.68 |
| M-S-M                | 0.51  | 1.31 | 4.16  | 1.82 | 0.82  | 1.82 |
| <b>543K/PBE0</b>     |       |      |       |      |       |      |
| Free SO <sub>4</sub> | 1.77  | 1.78 | 4.54  | 8.56 | 4.54  | 8.56 |
| Mono-CIP             | 1.86  | 0.75 | 4.88  | 9.10 | 4.88  | 3.26 |

|                          |      |      |       |      |      |      |
|--------------------------|------|------|-------|------|------|------|
| M-S-M                    | 0.37 | 0.76 | 10.61 | 9.22 | 5.14 | 4.10 |
| <hr/>                    |      |      |       |      |      |      |
| PBE/Free SO <sub>4</sub> |      |      |       |      |      |      |
| 330K                     | 0.79 | 0.65 | 0.55  | 0.48 | 4.10 | 2.39 |
| 543K                     | 1.55 | 2.04 | 3.94  | 8.16 | 3.94 | 8.17 |

Table S2. The lifetime and Number of HB for calculated ensembles (data\* is from direct integration. The other is from fitting of 3 parameters)

| Ensembles            | Values | Average bond number |     | Relevant Lifetime (ps) |             |
|----------------------|--------|---------------------|-----|------------------------|-------------|
|                      |        | s-w                 | w-w | s-w                    | w-w         |
| <hr/>                |        |                     |     |                        |             |
| Free SO <sub>4</sub> |        |                     |     |                        |             |
| PBE0/330K            |        | 9.0                 | 3.0 | 0.72*, 0.73            | 0.75*, 0.75 |
| PBE0/543K            |        | 6.7                 | 1.2 | 0.23*, 0.22            | 0.12*, 0.12 |
| PBE/330K             |        | 8.0                 | 3.3 | 1.46*, 1.48            | 1.54*, 1.54 |
| PBE/543K             |        | 6.6                 | 1.4 | 0.26*, 0.25            | 0.13*, 0.13 |
| <hr/>                |        |                     |     |                        |             |
| Mono-CIP             |        |                     |     |                        |             |
| PBE0/330K            |        | 7.4                 | 3.0 | 0.94*, 0.94            | 0.88*, 0.88 |
| PBE0/543K            |        | 5.0                 | 1.4 | 0.21*, 0.20            | 0.16*, 0.16 |
| <hr/>                |        |                     |     |                        |             |
| Bi-CIP               |        |                     |     |                        |             |
| PBE0/330K            |        | 6.2                 | 3.0 | 0.83*, 0.85            | 0.83*, 0.81 |
| <hr/>                |        |                     |     |                        |             |
| S-M-S                |        |                     |     |                        |             |
| PBE0/330K            |        | 7.2                 | 2.9 | 0.64*, 0.60            | 0.64*, 0.59 |
| <hr/>                |        |                     |     |                        |             |
| M-S-M                |        |                     |     |                        |             |
| PBE0/330K            |        | 5.7                 | 2.9 | 0.71*, 0.72            | 0.59*, 0.55 |
| PBE0/543K            |        | 3.9                 | 1.2 | 0.16*, 0.16            | 0.14*, 0.14 |

#### 4. The mean force diagram

The PMF is integrated from the mean force  $f(r)$  (Figure S3). The error for every  $r$  point is defined as the average  $f(r)$  of latter half steps minus the average  $f(r)$  of the beginning half steps.

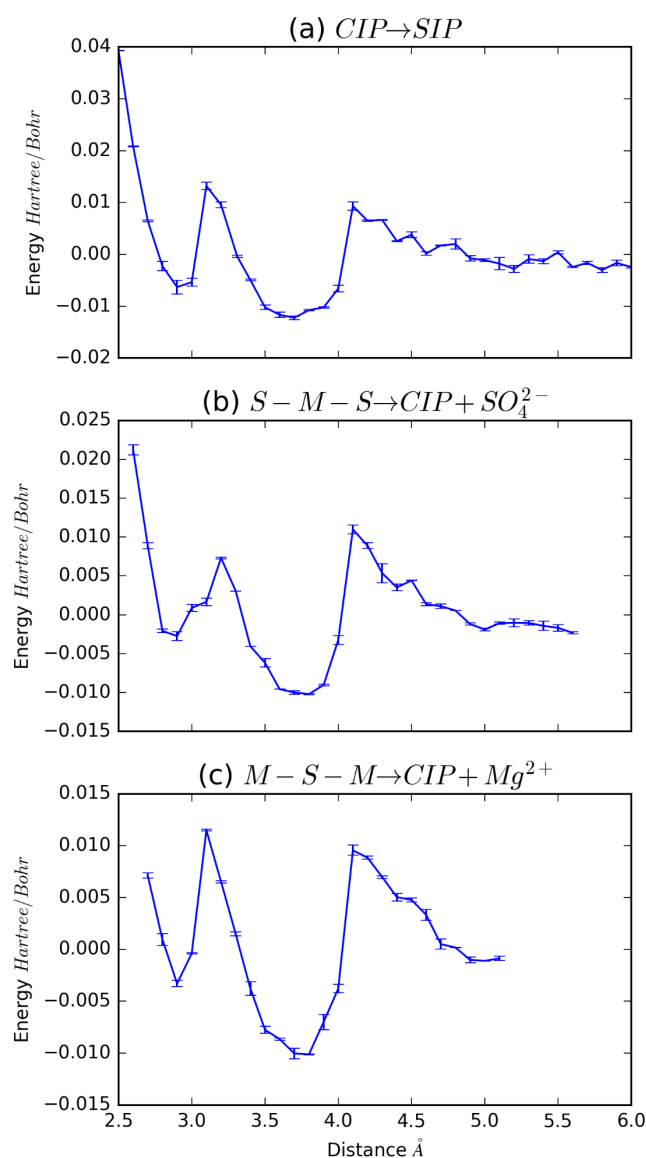

Figure S3. The mean force of process (a), (b) and (c)

## 5. The performance between PBE and PBE0

### 5.1 The calculated frequencies

The calculated frequencies of PBE shows a systemic decrease  $\sim 100$  cm<sup>-1</sup> compared to PBE0 and Exp. results (Table S3, Figure S4(a)(b)(c)). Same underestimation of  $\sim 100$  cm<sup>-1</sup> was also reported for water frequencies.<sup>5</sup>

The difference between those two functional is whether the Hartree-Fock (HF) exchange is involved. PBE0 contains 25% HF exchange term, 75% PBE exchange term and 100% PBE correlation term. The point for mixing the exchange term is because pure GGA functional like PBE, BLYP always overestimates the total electron energy due to the integration of electron-electron potential containing itself. The term of HF exchange can to some extent compensate such effect. The intrinsic description of the sulfate anion electron structure caused the wide deviation of vibration frequency.

Table S3. The vibrational frequencies of free sulfate anion using different functional (data with\* is from autocorrelation function of velocity. The other is from autocorrelation function of dipoles or polarizability)

| Phase/T                                 | Method            | $V_1(\text{R})-\text{E}$ | $V_2(\text{IR})-\text{T}_2$ | $V_3(\text{R})-\text{A}_1$ | $V_4(\text{IR})-\text{T}_2$ |
|-----------------------------------------|-------------------|--------------------------|-----------------------------|----------------------------|-----------------------------|
| Free $\text{SO}_4$<br>330K              | AIMD/PBE          | 417*,<br>420             | 584*,<br>576                | 905*,<br>906               | 1052*,<br>1056              |
|                                         | AIMD/PBE0         | 437*,<br>434             | 608*,<br>601                | 985*,<br>983               | 1138*,<br>1125              |
| Free $\text{SO}_4$<br>543K              | AIMD/PBE          | 409*,<br>406             | 580*,<br>566                | 895*,<br>896               | 1015*,<br>1011              |
|                                         | AIMD/PBE0         | 441*,<br>441             | 608*,<br>597                | 973*,<br>972               | 1117*,<br>1111              |
| $\text{Na}_2\text{SO}_4$<br>(0.7 mol/L) | Exp. <sup>6</sup> | 449                      | 613                         | 981                        | 1111                        |

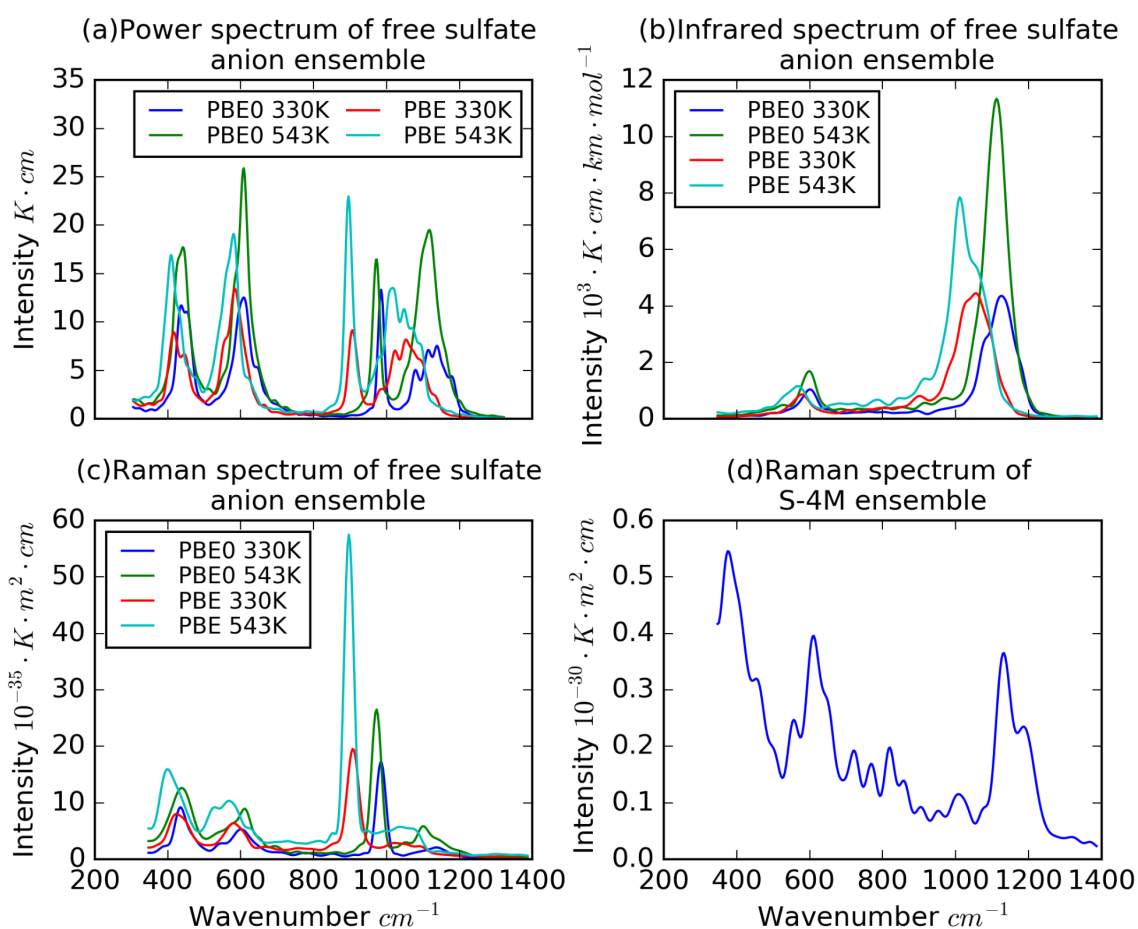

Figure S4. the Power, Infrared and Raman spectra of free sulfate anion under PBE and PBE0 and Raman spectra of S-4M at 330 K.

## 5.2 The water sphere around the surface anions

The first sphere water of sulfate anion at 330K has been counted and the Radial Distribution Function (RDF) between S-Ow (sulfate anion and Oxygen of water) was plotted (Figure S5). In PBE ensemble, the range from 2.95 to 4.35Å is considered to be the first water layer with a peak at 3.75Å. The peak of second layer is 5.35Å. In PBE0 ensemble, the range from 2.95 to 4.45Å is considered as the first layer. The location of the first peak is the same as PBE while the second peak is 5.75Å. X-ray Diffraction experiments<sup>7</sup> reveal the first peak is located at 3.67-3.89Å which is in agreement with both simulation's RDF. However, the coordination number (CN) of the first shell differs a lot. The average CN of PBE is 9.7 with most occurrence number of 9 and 10. The average CN of PBE0 is 10.8 with most occurrence number of 10 and 11. Vchirawongkwin et al.<sup>7</sup> has also performed QM/MM with pure HF to be its QM part. Their results of CN is 10.4.

Many studies have point out for pure water ensembles, PBE tends to overstructure hydrogen bonds among water molecules.<sup>8,9</sup> In Table S2, the lifetime of HB from PBE functional is twice the value of data from PBE0 functional for both s-w and w-w. The HB interaction tends to be more stable in PBE ensembles. Because of the preference for water molecules to form HB networks with each other, the interactions between sulfate anions and water molecules are depressed, causing the difference of the first water sphere.

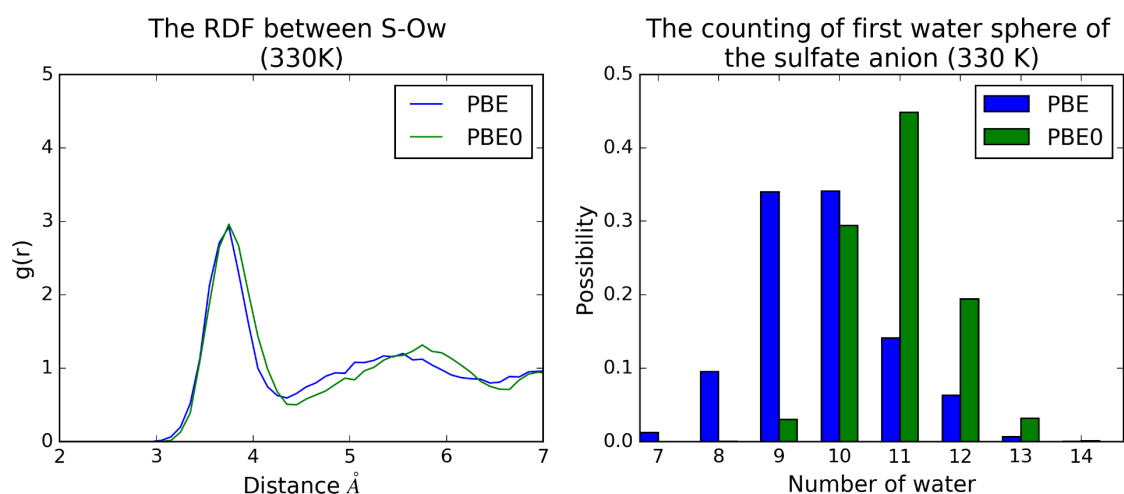

Figure S5. The RDF between S-Ow (left) and the counting of first water sphere of the sulfate anion (right)

## 6. Testing of classic force field

In order to preform large size ensemble of cluster aggregation, two popular classic force fields were tested: Madrid-2019<sup>11</sup> plus TIP4P water<sup>12</sup> and Mamatkulov 2013<sup>13</sup> plus SPC/E water<sup>14</sup>.

As demonstrated in the Figure S6, the free energy curve of CMD differs significantly from the AIMD results (Figure 2a). Figure S6a indicates  $Mg^{2+}$  and  $SO_4^{2-}$  wouldn't form CIP at 543K.

The free energy difference between SIP and CIP in Figure S6) is over 15 kcal/mol compared to



4.04 kcal/mol in AIMD results, which means that the formation of CIP is greatly overestimated. Balasubramanian et al.<sup>15</sup> calculated MgSO<sub>4</sub> in water by using the CMD method. Their radial distribution figure shows that bidentate complexing is favored over monodentate complexing, which conflicts with our AIMD results. The accuracy of CMD cannot be guaranteed by current available force field.

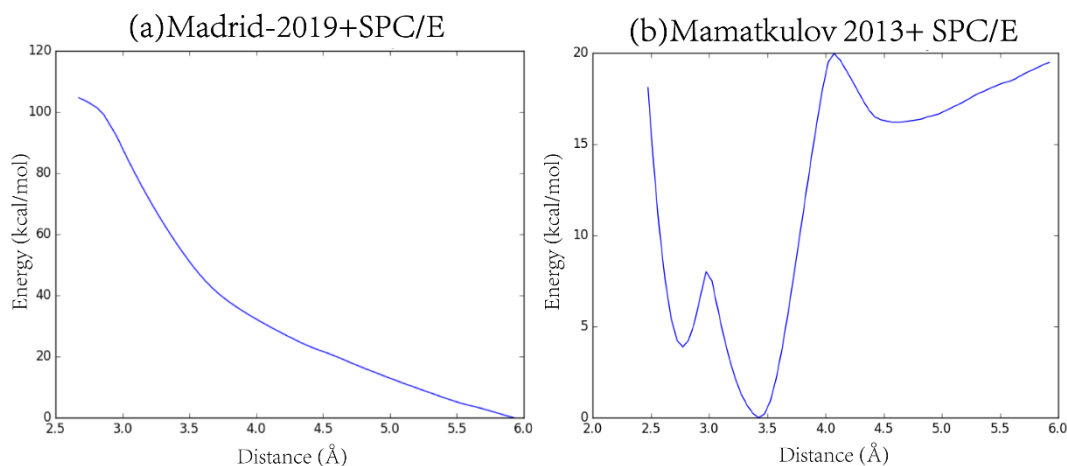

Figure S6. The PMF of CIP to SIP. (a) Madrid-2019+SPC/E (b) Mamatkulov 2013+ SPC/E. The distance between Mg and S was chosen as the reaction coordinate.

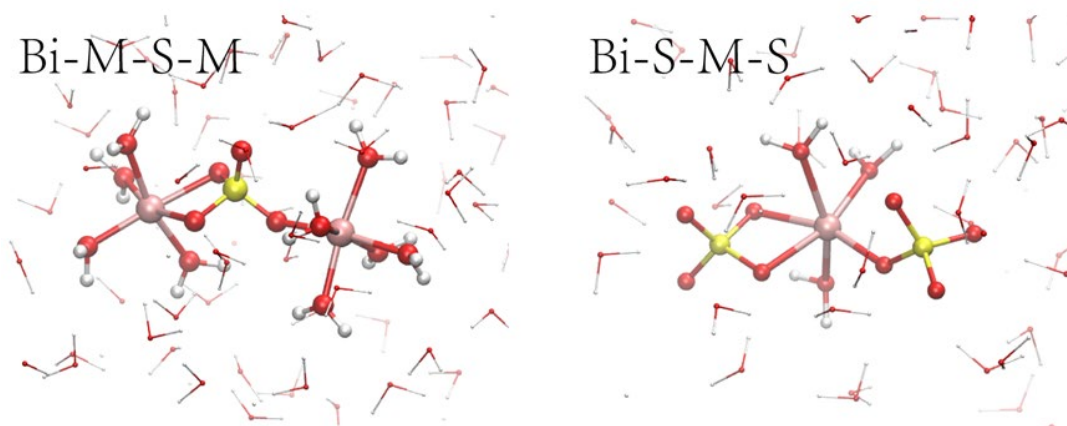

Figure S7. The snapshot of Bi-M-S-M and Bi-S-M-S. Not all water molecules are expressed. The figures of Mono-M-S-M and Mono-S-M-S are in Figure 1.

## Reference

- (1) Thomas, M.; Brehm, M.; Fligg, R.; Vöhringer, P.; Kirchner, B. Computing Vibrational Spectra from Ab Initio Molecular Dynamics. *Physical Chemistry Chemical Physics* **2013**, *15* (18), 6608.
- (2) Thomas, M. *Theoretical Modeling of Vibrational Spectra in the Liquid Phase*; Springer Theses; Springer International Publishing: Cham, 2017.
- (3) Gowers, R. J.; Carbone, P. A Multiscale Approach to Model Hydrogen Bonding: The Case of Polyamide. *The Journal of Chemical Physics* **2015**, *142* (22), 224907.

- (4) Luzar, A.; Chandler, D. Hydrogen-Bond Kinetics in Liquid Water. *Nature* **1996**, *379* (6560), 55–57.
- (5) Wan, Q.; Spanu, L.; Galli, G. A.; Gygi, F. Raman Spectra of Liquid Water from *Ab Initio* Molecular Dynamics: Vibrational Signatures of Charge Fluctuations in the Hydrogen Bond Network. *Journal of Chemical Theory and Computation* **2013**, *9* (9), 4124–4130.
- (6) Schmidt, C. Raman Spectroscopic Study of a H<sub>2</sub>O+Na<sub>2</sub>SO<sub>4</sub> Solution at 21–600°C and 0.1MPa to 1.1GPa: Relative Differential Raman Scattering Cross Sections and Evidence of the Liquid–Liquid Transition. *Geochimica et Cosmochimica Acta* **2009**, *73* (2), 425–437.
- (7) Vchirawongkwin, V.; Rode, B. M.; Persson, I. Structure and Dynamics of Sulfate Ion in Aqueous Solution An *Ab Initio* QMCF MD Simulation and Large Angle X-Ray Scattering Study. *The Journal of Physical Chemistry B* **2007**, *111* (16), 4150–4155.
- (8) Gaiduk, A. P.; Gygi, F.; Galli, G. Density and Compressibility of Liquid Water and Ice from First-Principles Simulations with Hybrid Functionals. *The Journal of Physical Chemistry Letters* **2015**, *6* (15), 2902–2908.
- (9) Yao, Y.; Kanai, Y. Free Energy Profile of NaCl in Water: First-Principles Molecular Dynamics with SCAN and  $\Omega$ B97X-V Exchange–Correlation Functionals. *J. Chem. Theory Comput.* **2018**, *14* (2), 884–893.
- (10) Momma, K.; Izumi, F. VESTA3 for Three-Dimensional Visualization of Crystal, Volumetric and Morphology Data. *Journal of Applied Crystallography* **2011**, *44* (6), 1272–1276.
- (11) Zeron, I. M.; Abascal, J. L. F.; Vega, C. A Force Field of Li<sup>+</sup>, Na<sup>+</sup>, K<sup>+</sup>, Mg<sup>2+</sup>, Ca<sup>2+</sup>, Cl<sup>-</sup>, and SO<sub>4</sub><sup>2-</sup> in Aqueous Solution Based on the TIP4P/2005 Water Model and Scaled Charges for the Ions. *J. Chem. Phys.* **2019**, *151* (13), 134504. <https://doi.org/10.1063/1.5121392>.
- (12) Abascal, J. L. F.; Vega, C. A General Purpose Model for the Condensed Phases of Water: TIP4P/2005. *The Journal of Chemical Physics* **2005**, *123* (23), 234505. <https://doi.org/10.1063/1.2121687>.
- (13) Mamatkulov, S.; Fyta, M.; Netz, R. R. Force Fields for Divalent Cations Based on Single-Ion and Ion-Pair Properties. *The Journal of Chemical Physics* **2013**, *138* (2), 024505. <https://doi.org/10.1063/1.4772808>.
- (14) Berendsen, H. J. C.; Grigera, J. R.; Straatsma, T. P. The Missing Term in Effective Pair Potentials. *The Journal of Physical Chemistry* **1987**, *91* (24), 6269–6271. <https://doi.org/10.1021/j100308a038>.
- (15) Balasubramanian, G.; Murad, S.; Kappiyoor, R.; Puri, I. K. Structure of Aqueous MgSO<sub>4</sub> Solution: Dilute to Concentrated. *Chemical Physics Letters* **2011**, *508* (1–3), 38–42. <https://doi.org/10.1016/j.cplett.2011.04.010>.
